# Supplementary material
Source: PubMed Central journal article supplement (PMC5405258)

1 **SUPPLEMENTARY FIGURE LEGENDS**

2

3 **Figure S1.** Temporal distribution of food samples tested positive for hepatitis E virus RNA.  
4 Numbers shown in boxes denote monthly number of positive samples.

5

6 **Figure S2.** Comparison of cycle threshold (Ct) value of hepatitis E virus (HEV) RNA in one-step  
7 quantitative reverse transcription-polymerase chain reaction assay between pig liver and other  
8 food samples. All pig liver samples are labelled with purple dots and those successfully genotyped  
9 are shown in a dark purple color. Red and blue dots denote oyster and pig intestine samples,  
10 respectively. Grey horizontal lines indicate median values.

11

12 **Figure S3.** Neighbor-joining phylogenetic tree of human and swine hepatitis E virus (HEV)  
13 obtained in this study from 2014—2016 in Hong Kong. The trees were constructed using Kimura  
14 2-parameter distance method with 1,000 bootstrap replicates. Sequences used were **(A)** partial  
15 open reading frame 1 (ORF1) 133 nucleotides in length and **(B)** partial ORF2/3 junction 97  
16 nucleotides in length. Sequences obtained in this study are shown in bold. Magenta squares  
17 denote pig liver samples and those collected in supermarket and wet market are labelled with a  
18 suffix S and W, respectively. Purple squares indicate human serum samples. Best three hits in  
19 BLAST search are included. Green triangle refers to the World Health Organization HEV RNA  
20 standard 6329/10 (subtype 3a). Proposed reference sequences of HEV subtypes are shown in  
21 brown and labelled in the following format: genotype and subtype, followed by GenBank  
22 accession number (1). Bootstrap values above a cut-off value of 70% are shown at nodes on the

23 phylogenetic tree. The tree is mid-point rooted. Scale bar indicates the number of nucleotide  
24 substitutions per site.

25

26

## 27 REFERENCES

- 28 1. **Smith DB, Simmonds P, Jameel S, Emerson SU, Harrison TJ, Meng XJ, Okamoto H, Van der Poel WH,**  
29 **and Purdy MA.** 2014. Consensus proposals for classification of the family Hepeviridae. *J Gen Virol*  
30 **95:2223-2232.**
- 31 2. **Jothikumar N, Cromeans TL, Robertson BH, Meng XJ, and Hill VR.** 2006. A broadly reactive one-step  
32 real-time RT-PCR assay for rapid and sensitive detection of hepatitis E virus. *J Virol Methods* **131:65-**  
33 **71.**
- 34 3. **La Rosa G, Fratini M, Muscillo M, Iaconelli M, Taffon S, Equestre M, Chionne P, Madonna E, Pisani**  
35 **G, Bruni R, and Ciccaglione AR.** 2014. Molecular characterisation of human hepatitis E virus from  
36 Italy: comparative analysis of five reverse transcription-PCR assays. *Virol J* **11:72.**

37 **Table S1.** Food sampling strategy.

| Food Item      | Sampling Frequency | Number of District | Supermarket | Wet Market | Duration (mo) | Total Sample Number |
|----------------|--------------------|--------------------|-------------|------------|---------------|---------------------|
| Lamb           | Twice monthly      | 5                  | +           |            | 24            | 240                 |
| Oyster         | Twice monthly      | 5                  | +           | +          | 24            | 479                 |
| Pig blood curd | Twice monthly      | 5                  |             | +          | 24            | 240                 |
| Pig intestine  | Twice monthly      | 5                  |             | +          | 24            | 240                 |
| Pig liver      | Twice monthly      | 5                  | +           | +          | 24            | 479                 |

38 + indicates food item was purchased in that market setting. mo, month.

39 **Table S2.** Primers used in virus detection and genotyping.

| Primer Name      | Target Region | Function                        | Nucleotide Sequence (5'-3')  | Positions* | Reference |
|------------------|---------------|---------------------------------|------------------------------|------------|-----------|
| Virus detection  |               |                                 |                              |            |           |
| JVHEV-F          | ORF3          | Detection                       | GGTGGTTTCTGGGGTGAC           | 5261-5278  | (2)       |
| JVHEV-R          |               |                                 | AGGGGTTGGTTGGATGAA           | 5313-5330  |           |
| JVHEV-P          |               |                                 | 6FAM-TGATTCTCAGCCCTTCGC-BHQ1 | 5284-5301  |           |
| Virus genotyping |               |                                 |                              |            |           |
| HEV-1679-F       | ORF1          | Outer PCR                       | CCAYCAGTTYATHAAGGCTCC        | 36-56      | (3)       |
| HEV-1680-R       |               |                                 | TACCAVCGCTGRACRTC            | 383-367    |           |
| HEV-1681-F       |               | Inner PCR and Sanger sequencing | CTCCTGGCRTYACWACTGC          | 53-71      |           |
| HEV-1682-R       |               |                                 | GGRTGRTCCANARVACYTC          | 224-205    |           |
| HEV-1847-F       | ORF2/3        | Outer PCR                       | GCRGTGGTTTCTGGGGTGAC         | 5259-5278  |           |

|            |  |                                    |                      |           |  |
|------------|--|------------------------------------|----------------------|-----------|--|
| HEV-1848-R |  |                                    | CTGGGMYTGGTCDGCCAAG  | 5422-5403 |  |
| HEV-1849-F |  | Inner PCR and Sanger<br>sequencing | GYTGATTCTCAGCCCTTCGC | 5282-5301 |  |
| HEV-1850-R |  |                                    | GMYTGGTCDGCCAAGHGGA  | 5418-5399 |  |

40 \*Primer positions are with reference to GenBank accession number M73218.

41 ORF, open reading frame; PCR, polymerase chain reaction.

|                       | 2014 |   |   |    |   |   |    |   |   | 2015 |   |   |    |   |   |    |   |   | 2016 |   |   |    |   |   |
|-----------------------|------|---|---|----|---|---|----|---|---|------|---|---|----|---|---|----|---|---|------|---|---|----|---|---|
|                       | Q2   |   |   | Q3 |   |   | Q4 |   |   | Q1   |   |   | Q2 |   |   | Q3 |   |   | Q4   |   |   | Q1 |   |   |
|                       | A    | M | J | J  | A | S | O  | N | D | J    | F | M | A  | M | J | J  | A | S | O    | N | D | J  | F | M |
| <b>Pig liver</b>      |      | 1 |   | 1  |   |   |    | 1 | 1 |      |   |   | 1  |   |   | 1  |   | 1 |      |   |   |    |   |   |
| <b>Pig intestine</b>  |      |   | 1 |    |   |   |    |   |   |      |   |   |    |   |   |    |   |   |      |   |   |    |   |   |
| <b>Pig blood curd</b> |      |   |   |    |   |   |    |   |   |      |   |   |    |   |   |    |   |   |      |   |   |    |   |   |
| <b>Oyster</b>         |      | 1 |   |    |   |   |    |   |   |      |   |   |    |   |   |    |   |   |      |   |   |    |   |   |
| <b>Lamb</b>           |      |   |   |    |   |   |    |   |   |      |   |   |    |   |   |    |   |   |      |   |   |    |   |   |

 Supermarket

 Wet market

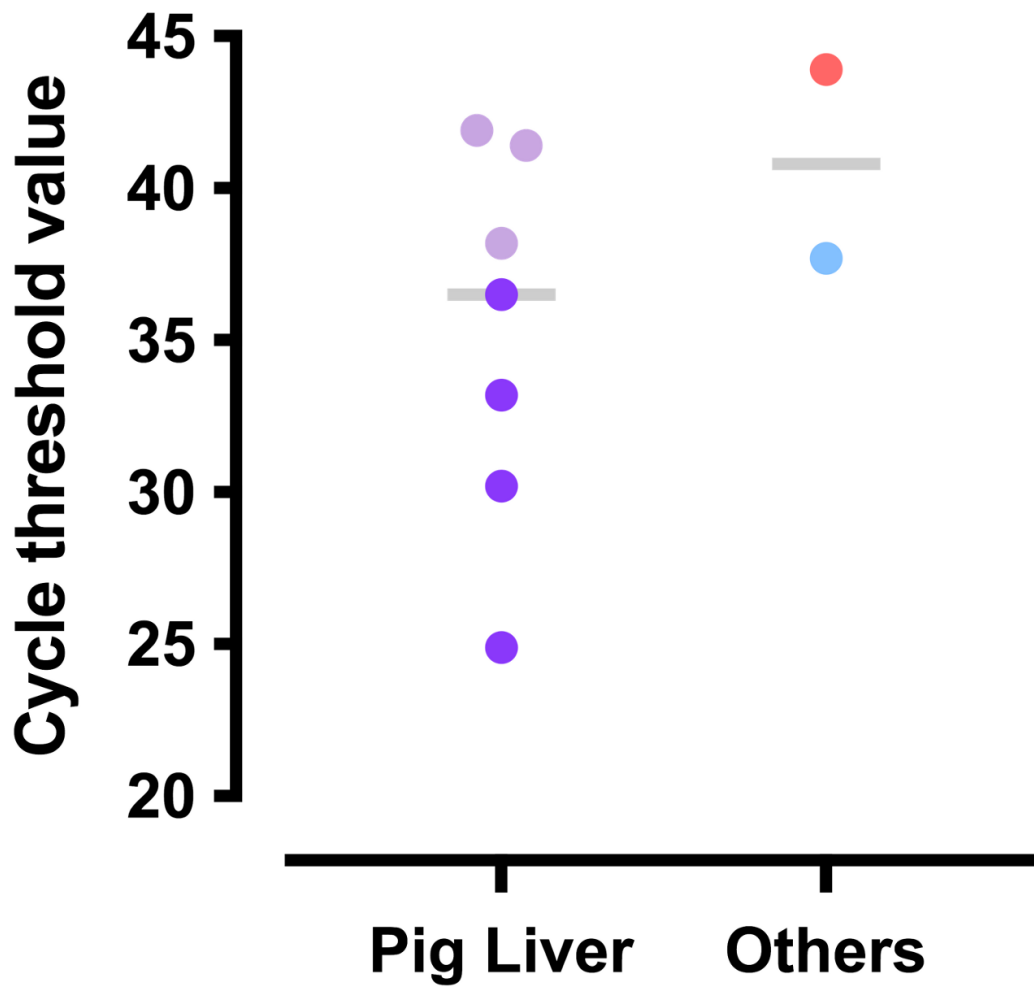

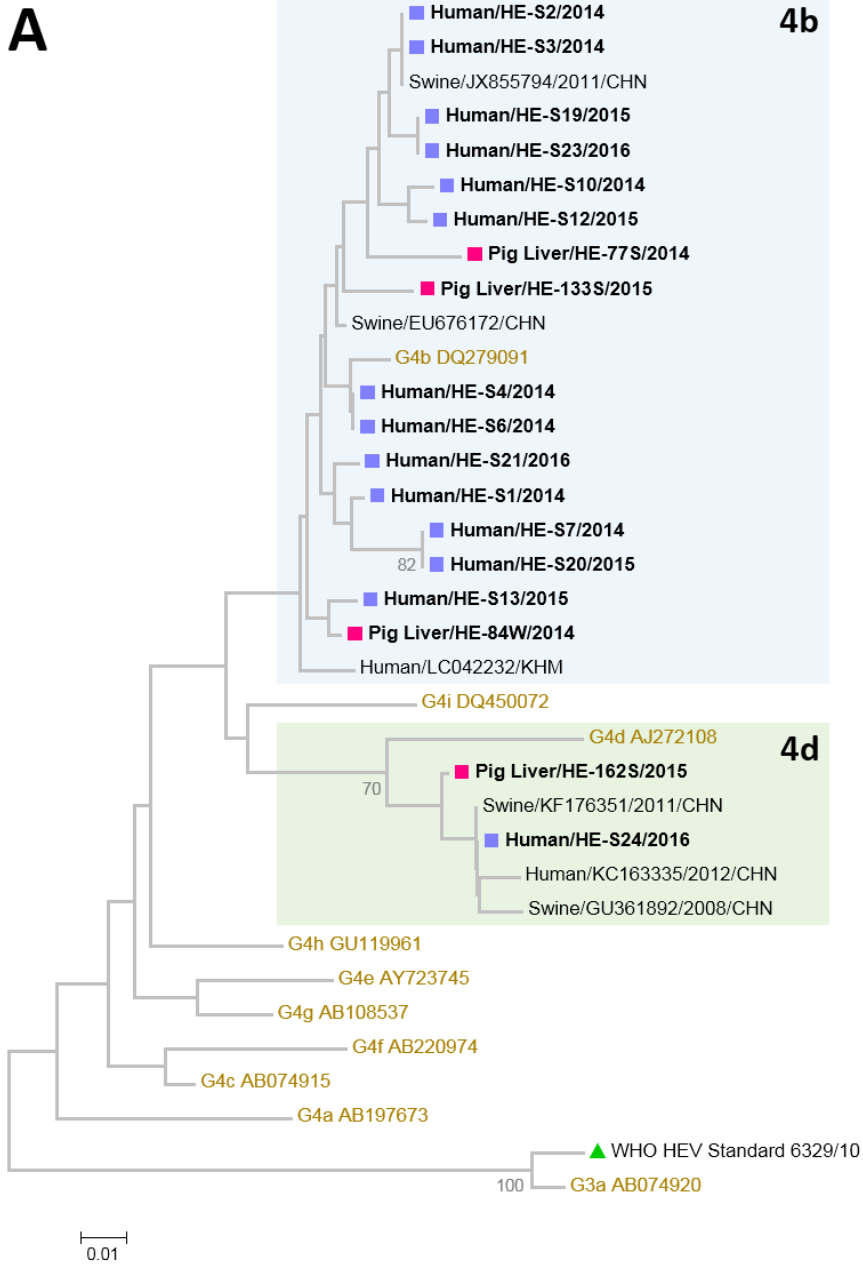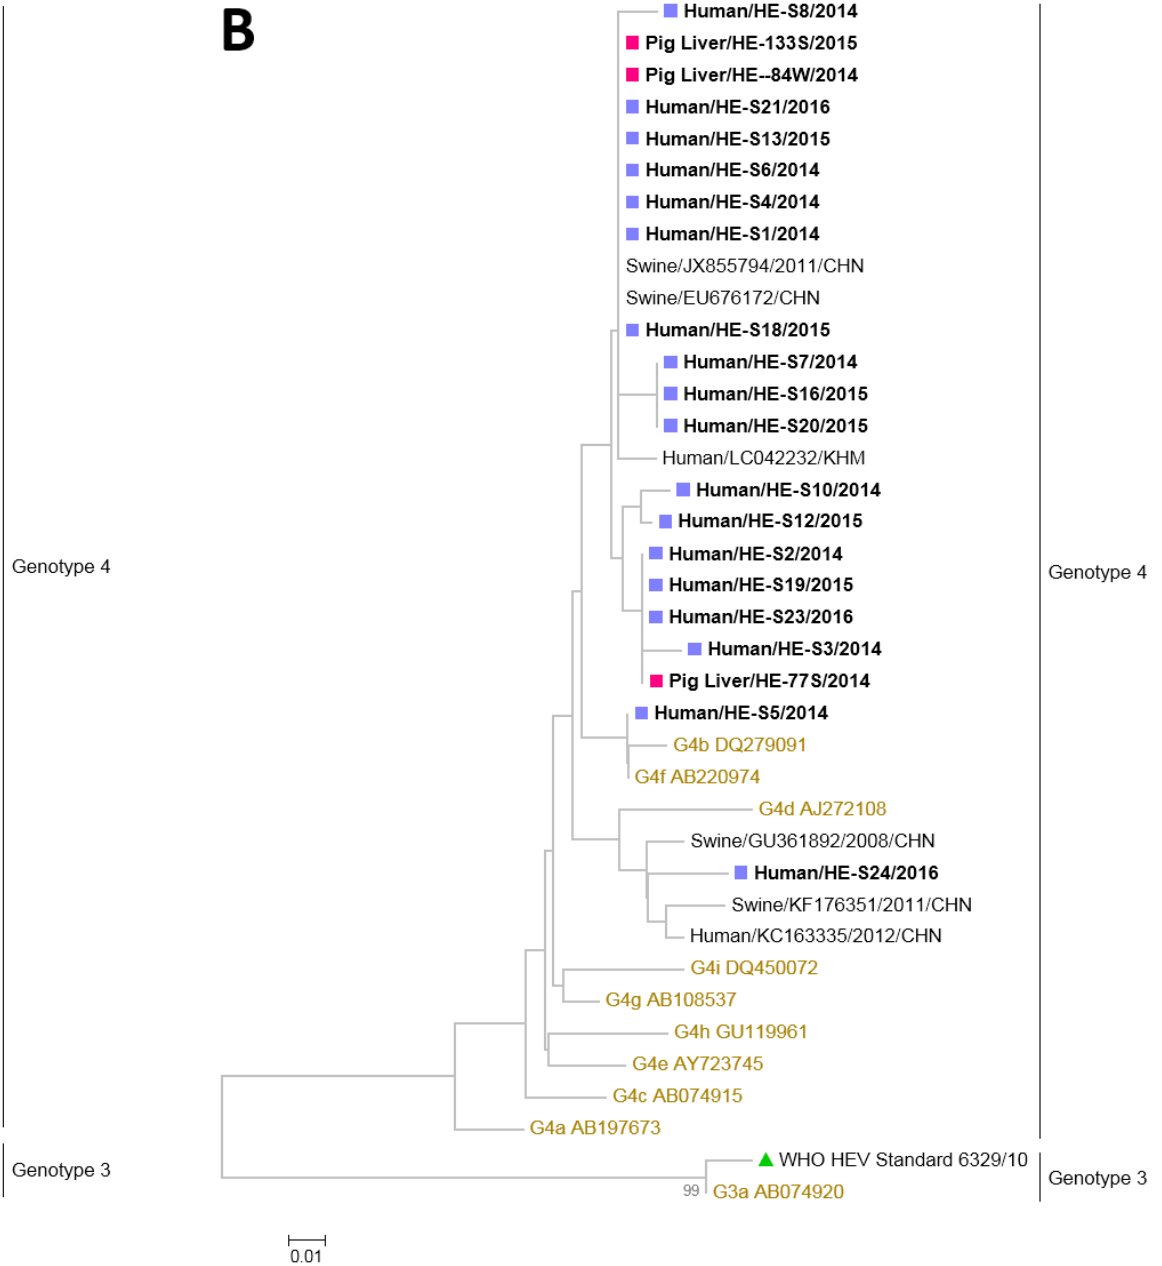

Supplement: JCM.02020-16_zjm999095454s1.pdf [file JCM.02020-16_zjm999095454s1.pdf]
